# Supplementary material for: Identification, expression, and functional analysis of CLE genes in radish (Raphanus sativus L.) storage root
Source: PubMed Central journal article supplement (PMC4895270; doi:10.1186/s12870-015-0687-y), 2016-01-27
Supplement: 12870_2015_687_MOESM1_ESM.pdf [file 12870_2015_687_MOESM1_ESM.pdf]

Table 1. Expression of *RsCLE* genes in the organs of *Raphanus raphanistrum* and *Raphanus sativus* 15-day old plants.

| Gene               | Organ      | Expression in radish   |                             | Gene           | Organ      | Expression in radish   |                             |
|--------------------|------------|------------------------|-----------------------------|----------------|------------|------------------------|-----------------------------|
|                    |            | <i>R. raphanistrum</i> | <i>R. sativus</i> (line 27) |                |            | <i>R. raphanistrum</i> | <i>R. sativus</i> (line 27) |
| <i>RsCLE1</i>      | Root       | +                      | +/-                         | <i>RsCLE19</i> | Root       | -                      | ++                          |
|                    | Hypocotyl  | +/-                    | -                           |                | Hypocotyl  | +                      | +/-                         |
|                    | Leaf       | -                      | -                           |                | Leaf       | -                      | -                           |
|                    | Shoot apex | -                      | -                           |                | Shoot apex | +                      | -                           |
| <i>RsCLE2</i>      | Root       | ++                     | ++                          | <i>RsCLE20</i> | Root       | +                      | +                           |
|                    | Hypocotyl  | +                      | +/-                         |                | Hypocotyl  | +/-                    | +                           |
|                    | Leaf       | -                      | -                           |                | Leaf       | +                      | +/-                         |
|                    | Shoot apex | -                      | -                           |                | Shoot apex | +                      | ++                          |
| <i>RsCLE4</i>      | Root       | +/-                    | +/-                         | <i>RsCLE22</i> | Root       | +/-                    | +/-                         |
|                    | Hypocotyl  | -                      | -                           |                | Hypocotyl  | +/-                    | ++                          |
|                    | Leaf       | -                      | -                           |                | Leaf       | -                      | +/-                         |
|                    | Shoot apex | -                      | -                           |                | Shoot apex | +/-                    | ++                          |
| <i>RsCLE5</i>      | Root       | +                      | +                           | <i>RsCLE25</i> | Root       | +                      | ++                          |
|                    | Hypocotyl  | ++                     | ++                          |                | Hypocotyl  | +                      | ++                          |
|                    | Leaf       | -                      | -                           |                | Leaf       | +/-                    | +/-                         |
|                    | Shoot apex | +                      | +/-                         |                | Shoot apex | +                      | ++                          |
| <i>RsCLE1</i><br>1 | Root       | +                      | +                           | <i>RsCLE26</i> | Root       | +                      | +                           |
|                    | Hypocotyl  | +                      | +                           |                | Hypocotyl  | +                      | +/-                         |
|                    | Leaf       | -                      | -                           |                | Leaf       | +                      | -                           |
|                    | Shoot apex | -                      | -                           |                | Shoot apex | +                      | +/-                         |
| <i>RsCLE1</i><br>2 | Root       | +/-                    | -                           | <i>RsCLE27</i> | Root       | +/-                    | +/-                         |
|                    | Hypocotyl  | -                      | -                           |                | Hypocotyl  | -                      | +/-                         |
|                    | Leaf       | -                      | +/-                         |                | Leaf       | -                      | -                           |
|                    | Shoot apex | +/-                    | -                           |                | Shoot apex | -                      | ++                          |
| <i>RsCLE1</i><br>3 | Root       | +/-                    | +/-                         | <i>RsCLE40</i> | Root       | +                      | +                           |
|                    | Hypocotyl  | -                      | -                           |                | Hypocotyl  | -                      | -                           |
|                    | Leaf       | -                      | -                           |                | Leaf       | -                      | -                           |
|                    | Shoot apex | -                      | -                           |                | Shoot apex | -                      | -                           |
| <i>RsCLE1</i><br>6 | Root       | ++                     | ++                          | <i>RsCLE41</i> | Root       | +                      | +                           |
|                    | Hypocotyl  | ++                     | ++                          |                | Hypocotyl  | ++                     | ++                          |
|                    | Leaf       | ++                     | ++                          |                | Leaf       | +                      | +                           |
|                    | Shoot apex | ++                     | ++                          |                | Shoot apex | ++                     | ++                          |
| <i>RsCLE1</i><br>7 | Root       | -                      | -                           | <i>RsCLE42</i> | Root       | +                      | +                           |
|                    | Hypocotyl  | -                      | -                           |                | Hypocotyl  | +                      | +/-                         |
|                    | Leaf       | -                      | -                           |                | Leaf       | +/-                    | +/-                         |
|                    | Shoot apex | -                      | -                           |                | Shoot apex | +                      | +/-                         |
