# Supplementary material for: Identification, expression, and functional analysis of CLE genes in radish (Raphanus sativus L.) storage root
Source: PubMed Central journal article supplement (PMC4895270; doi:10.1186/s12870-015-0687-y), 2016-01-27

Figure 1. Expression of *RsCLE* genes in different organs of seedling in *Rapahnus sativus*.

Expression levels are shown relative to the expression of *RsCLE1* found in the apex of 7-day old seedlings.

Error bars indicate standard deviation of three technical repeats.

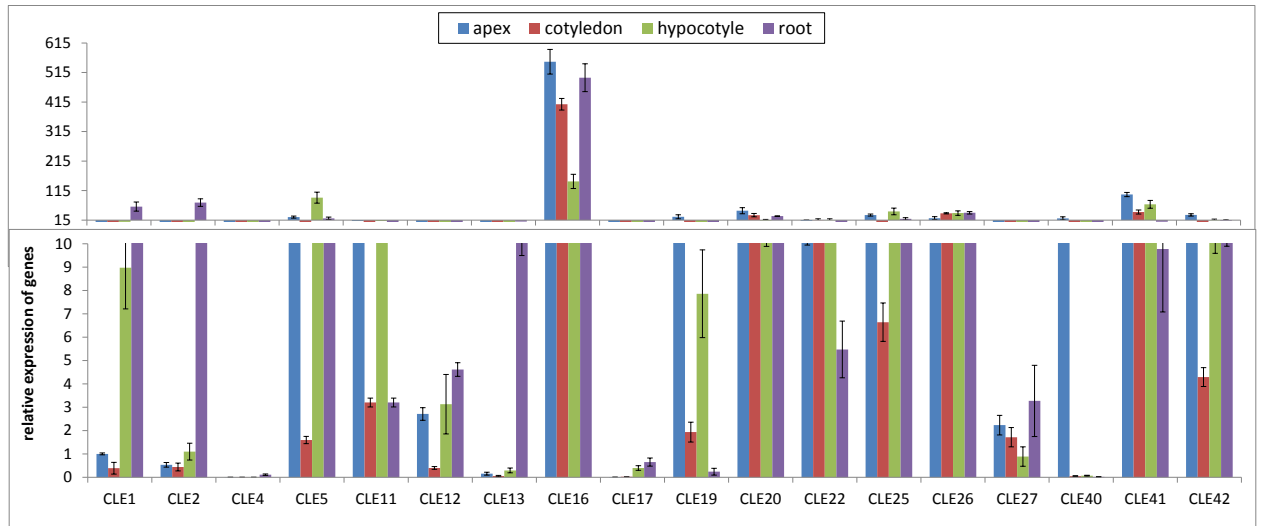

Supplement: 12870_2015_687_MOESM2_ESM.pdf [file 12870_2015_687_MOESM2_ESM.pdf]
