# Supplementary material for: Identification, expression, and functional analysis of CLE genes in radish (Raphanus sativus L.) storage root
Source: PubMed Central journal article supplement (PMC4895270; doi:10.1186/s12870-015-0687-y), 2016-01-27
Supplement: 12870_2015_687_MOESM3_ESM.pdf [file 12870_2015_687_MOESM3_ESM.pdf]

1 Figure 2. Expression of *RsCLE* genes in hypocotyls of *Rapahnus sativus* and *Raphanus sativus*  
 2 (line 27) at different stage of development. Expression levels are shown relative to the  
 3 expression found in the hypocotyl of 7-day old seedlings.  
 4 Error bars indicate standard deviation of three technical repeats.  
 5

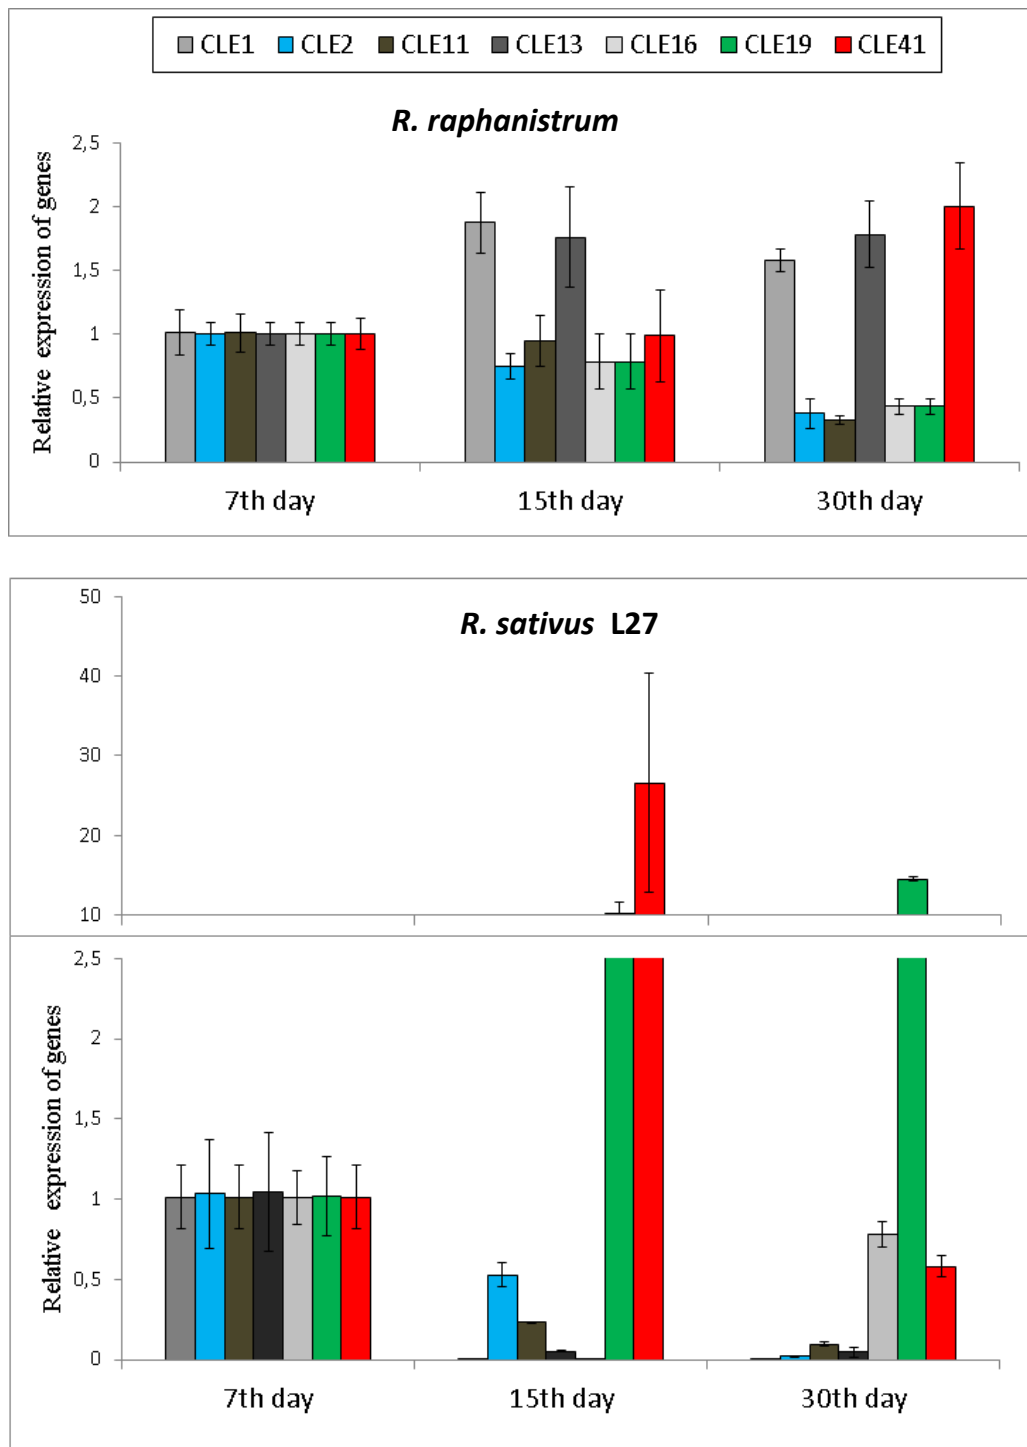

6  
 7  
 8
