# Supplementary material for: Identification, expression, and functional analysis of CLE genes in radish (Raphanus sativus L.) storage root
Source: PubMed Central journal article supplement (PMC4895270; doi:10.1186/s12870-015-0687-y), 2016-01-27
Supplement: 12870_2015_687_MOESM4_ESM.pdf [file 12870_2015_687_MOESM4_ESM.pdf]

Table 2. Primers for identification of *RsCLE* genes.

| Gene           | Primers                                                    | Gene           | Primers                                                         |
|----------------|------------------------------------------------------------|----------------|-----------------------------------------------------------------|
| <i>RsCLE1</i>  | F atggctaacaatgaaagttggctg<br>R tcagtgatgacgagggtcggga     | <i>RsCLE19</i> | F attggcttcttctctctgattcttgc<br>R ttacctgttggagtgattgga         |
| <i>RsCLE2</i>  | F atggctaagttaagcttcactttctg<br>R ctggtgatgttgggtcgggtc    | <i>RsCLE20</i> | F gtcgtcctcgttctctgtctcat<br>R tcatcgcttgtttaaagga              |
| <i>RsCLE4</i>  | F atggcaagttcaacaagtattggg<br>R tttagtgatgtctagggtcc       | <i>RsCLE22</i> | F atgagaaataactactccagaagaaaacc<br>R ttatcaactgtcgaaggattagg    |
| <i>RsCLE5</i>  | F tctctctcaactcccaccctc<br>R gaaaccctgtcggaaactcactaaaa    | <i>RsCLE25</i> | F atgggtggaagtggcattagag<br>R tcatactcgttggctcgtctcg            |
| <i>RsCLE11</i> | F tgcgtatgtcaccaccacca<br>R accacccttaatcatcattgt          | <i>RsCLE26</i> | F acccagaagacaagacagaaagaaga<br>R ctagtatggagaggatctggacca      |
| <i>RsCLE12</i> | F atgcttagaatttcttcatcatcttcc<br>R ccaatcccgttaccattga     | <i>RsCLE27</i> | F atggcggcgatgaaatacaaagg<br>R ctatggagtaaaaggaatgtgtttatgatgaa |
| <i>RsCLE13</i> | F atagccacgagtagagtctccac<br>R tcagtcgtgtaagcggttg         | <i>RsCLE40</i> | F atggcaacaatcaaatgaccaaacca<br>R ctgaagattcgaggagaaccctcttg    |
| <i>RsCLE16</i> | F acaaaagaagaagaagaagacgagcag<br>R agttgtggagaggattggacctg | <i>RsCLE41</i> | F tatttggataacatgtgatgagatc<br>R ctattggagatgggatttgac          |
| <i>RsCLE17</i> | F atgactcaagtgttggtacgaaga<br>R ttagttgtggagaggattgggac    | <i>RsCLE42</i> | F atgggtggaagtggcattagag<br>R tcatactcgttggctcgtctcg            |
