# Supplementary material for: Identification, expression, and functional analysis of CLE genes in radish (Raphanus sativus L.) storage root
Source: PubMed Central journal article supplement (PMC4895270; doi:10.1186/s12870-015-0687-y), 2016-01-27
Supplement: 12870_2015_687_MOESM5_ESM.pdf [file 12870_2015_687_MOESM5_ESM.pdf]

Table 3. Synthetic CLE peptides used for treatment of radish plants.

| Peptide             | Sequence*      |
|---------------------|----------------|
| CLE2                | RLShPGGhPDPQHH |
| CLE19               | RVIhPTGhPNPLHN |
| CLE41               | HEVhPSGhPNPISN |
| CLE41-def (control) | HEVPSGPNAISN   |

\*hP - hydroxyproline
